# Supplementary material for: Deeper insight into the properties of the newly synthesized macrocycles as drug receptors – some preliminary quantum chemical studies
Source: Royal Society of Chemistry journal article supplement (doi:10.1039/c6nj03089k), 2016-12-01
Supplement: c6nj03089k1.pdf [file c6nj03089k1.pdf]

**SUPPLEMENTARY INFORMATION:**

**Journal: New Journal of Chemistry**

Deeper insight into properties  
of the newly synthesized macrocycles as drugs receptors  
– some preliminary quantum chemical studies.

Anna Ignaczak,<sup>\*a</sup> Stanisław Porwański<sup>\*b</sup> and Michalina Szyszka<sup>b</sup>

<sup>a</sup> Department of Theoretical and Structural Chemistry, Faculty of Chemistry, University of Lodz, Pomorska 163/165, 90-236 Łódź, Poland, e-mail: [anignacz@uni.lodz.pl](mailto:anignacz@uni.lodz.pl)

<sup>b</sup> Department of Organic and Applied Chemistry, Faculty of Chemistry, University of Lodz, Tamka 12, 91-403 Łódź, Poland, e-mail: [porwany@chemia.uni.lodz.pl](mailto:porwany@chemia.uni.lodz.pl)

**Table S1**

Comparison of selected vibrations observed in the B3LYP/6-31G(d,p) calculated IR spectra in vacuo (frequencies  $\nu$  scaled by 0.961) with experimental peaks.

Abbreviations: OOP = out-of-plane; gluc – glucose units connected with urea fragments; gluc' – subsequent glucose units; sciss – scissors; deform - deformation

| Host A                       |                           |                                                                                       | Host B                       |                           |                                                                      | Host C                       |                           |                                                             | Experiment |
|------------------------------|---------------------------|---------------------------------------------------------------------------------------|------------------------------|---------------------------|----------------------------------------------------------------------|------------------------------|---------------------------|-------------------------------------------------------------|------------|
| $\nu$<br>[cm <sup>-1</sup> ] | <i>Intens</i><br>[km/mol] | Modes                                                                                 | $\nu$<br>[cm <sup>-1</sup> ] | <i>Intens</i><br>[km/mol] | Modes                                                                | $\nu$<br>[cm <sup>-1</sup> ] | <i>Intens</i><br>[km/mol] | Modes                                                       |            |
| <b>450</b>                   | 208                       | CCOH torsion,<br>NH OOP bend                                                          | <b>541</b>                   | 140                       | CCOH torsion,<br>NH OOP bend                                         | <b>506</b>                   | 62                        | CCOH torsion,<br>NH OOP bend,<br>crown CH <sub>2</sub> rock |            |
| <b>528</b>                   | 174                       | CCOH torsion                                                                          | <b>544</b>                   | 150                       | CCOH torsion                                                         |                              |                           |                                                             |            |
| <b>589</b>                   | 114                       | CCOH torsion                                                                          | <b>554</b>                   | 115                       | CCOH torsion,<br>C-OH stretch,<br>OCH bend,<br>C6'H <sub>2</sub> wag | <b>596</b>                   | 96                        | CCOH torsion,<br>NH OOP bend                                | <b>568</b> |
|                              |                           |                                                                                       | <b>609</b>                   | 114                       | CCOH torsion                                                         | <b>606</b>                   | 64                        | CCOH torsion                                                |            |
| <b>658</b>                   | 110                       | CCOH torsion,<br>NH OOP bend                                                          |                              |                           |                                                                      |                              |                           |                                                             | <b>637</b> |
| <b>677</b>                   | 142                       | CCOH torsion,<br>NH OOP bend                                                          |                              |                           |                                                                      |                              |                           |                                                             |            |
| <b>696</b>                   | 145                       | CCOH torsion,<br>NH OOP bend,<br>CH <sub>2</sub> rock,<br>CH OOP bend,<br>gluc deform |                              |                           |                                                                      |                              |                           |                                                             |            |

|            |          |                                                                                        |             |     |                                                                                                                 |            |     |                                                                                        |            |
|------------|----------|----------------------------------------------------------------------------------------|-------------|-----|-----------------------------------------------------------------------------------------------------------------|------------|-----|----------------------------------------------------------------------------------------|------------|
| <b>707</b> | 99       | CCOH torsion                                                                           | <b>712</b>  | 62  | CCOH torsion,<br>NH OOP bend                                                                                    | <b>704</b> | 204 | CCOH torsion,<br>NH OOP bend                                                           | <b>726</b> |
|            |          |                                                                                        | <b>750</b>  | 71  | CCOH torsion,<br>NH OOP bend                                                                                    | <b>769</b> | 103 | CCOH torsion,<br>CCH bend,<br>C6'H <sub>2</sub> rock                                   | <b>766</b> |
|            |          |                                                                                        |             |     |                                                                                                                 | <b>774</b> | 89  | CCOH torsion,<br>CCH bend,<br>crown CH <sub>2</sub> rock                               |            |
| <b>875</b> | 81       | CCOH torsion,<br>gluc' deform                                                          | <b>824</b>  | 111 | CCOH torsion,<br>CCH bend,<br>C6'H <sub>2</sub> rock                                                            |            |     |                                                                                        | <b>895</b> |
| <b>957</b> | 134      | gluc deform (CO &<br>CC stretch, C6'H <sub>2</sub><br>rock, COH & CCH<br>bend)         | <b>935</b>  | 127 | CCOH torsion,<br>C6'H <sub>2</sub> & C6H <sub>2</sub><br>rock,<br>CCH bend,<br>gluc'CO stretch,<br>gluc' deform | <b>943</b> | 64  | gluc'C-O-Cgluc<br>sym stretch,<br>gluc deform (CC<br>&C5C6 stretch),<br>gluc' CCH bend |            |
| <b>970</b> | 157, 154 | gluc & gluc' deform<br>(CO & CC stretch,<br>C6'H <sub>2</sub> rock, COH &<br>CCH bend) | <b>967</b>  | 77  | glucCN & glucCO<br>stretch, crown<br>CH <sub>2</sub> , rock, gluc<br>COH bend                                   | <b>986</b> | 121 | gluc' deform,<br>C6'-OH stretch &<br>bend,<br>C6'H <sub>2</sub> rock,<br>gluc CCH bend |            |
|            |          |                                                                                        | <b>1012</b> | 77  | C5C6, C2-OH &<br>C3-OH stretch,<br>gluc deform (CC<br>stretch, CCH<br>bend),<br>CC2'H bend,<br>C3'OH bend       | <b>991</b> | 143 | C6'-OH stretch,<br>gluc' deform,<br>C2'OH bend                                         |            |

|             |                                                    |             |                                                                                                                                                    |             |                                                                                                     |
|-------------|----------------------------------------------------|-------------|----------------------------------------------------------------------------------------------------------------------------------------------------|-------------|-----------------------------------------------------------------------------------------------------|
|             |                                                    | <b>1014</b> | 87 C4'-OH stretch,<br>gluc' deform (CC<br>stretch, CCH<br>bend),<br>C6'H <sub>2</sub> rock,<br>glucC-O-Cgluc'<br>stretch,                          |             |                                                                                                     |
| <b>1020</b> | 413 crown CN stretch,<br>C-OH stretch,<br>CCH bend |             |                                                                                                                                                    | <b>1019</b> | 165 gluc' deform<br>(COC asym<br>stretch, C6'H <sub>2</sub><br>rock, COH & CCH<br>bend)             |
|             |                                                    | <b>1021</b> | 214 C4'-OH stretch,<br>gluc' deform (COC<br>asym stretch),<br>glucC-O-Cgluc'<br>stretch,<br>C3-OH stretch,<br>gluc deform                          | <b>1023</b> | 272 C5'C6' stretch,<br>COH & CCH<br>bend                                                            |
|             |                                                    | <b>1024</b> | 169 C6'-OH & C4'-OH<br>stretch,<br>gluc' deform (COC<br>asym stretch),<br>glucC-O-Cgluc'<br>stretch,<br>C3-OH stretch,<br>gluc deform,<br>COH bend | <b>1024</b> | 142 glucCN stretch,<br>crown deform<br>(CN CC stretch,<br>CH <sub>2</sub> twist),<br>gluc' COH bend |
|             |                                                    |             |                                                                                                                                                    | <b>1029</b> | 187 C2'-OH stretch,<br>C6-OH stretch &<br>bend,<br>C3'OH & C6'OH<br>bend                            |
|             |                                                    |             |                                                                                                                                                    |             | <b>1028</b>                                                                                         |
|             |                                                    |             |                                                                                                                                                    |             | <b>1075</b>                                                                                         |

|             |     |                                                                                                                          |             |          |                                                                                                                                                     |             |     |                                                                                               |
|-------------|-----|--------------------------------------------------------------------------------------------------------------------------|-------------|----------|-----------------------------------------------------------------------------------------------------------------------------------------------------|-------------|-----|-----------------------------------------------------------------------------------------------|
| <b>1044</b> | 133 | gluc' C-OH stretch,<br>COH bend,<br>gluc' deform (CC<br>stretch, CCH bend)                                               | <b>1048</b> | 199      | C6'-OH & C4'-OH<br>stretch,<br>gluc' deform (COC<br>asym stretch),<br>glucC-O-Cgluc'<br>stretch,<br>C3-OH stretch,<br>gluc deform,<br>C6-OH stretch | <b>1035</b> | 182 | glucCN stretch,<br>crown deform<br>(CC stretch),<br>gluc deform &<br>CCH bend                 |
| <b>1055</b> | 213 | glucC-O-Cgluc'<br>stretch,<br>gluc & gluc' C-OH<br>stretch,<br>gluc & gluc' deform<br>(CC stretch, CCH<br>bend)          | <b>1041</b> | 105      | C3'-OH, C4'-OH<br>& C6'-OH stretch,<br>gluc' deform<br>(CCC & CCH<br>bend),<br>C6OH bend                                                            | <b>1038</b> | 134 | C3-OH & C6-OH<br>stretch,<br>COH bend,<br>gluc' & gluc<br>deform (CC<br>stretch, CCH<br>bend) |
| <b>1056</b> | 462 | gluc C-OH stretch,<br>glucC-O stretch,<br>gluc'C-OH & CCH<br>bend,<br>CNH bend,<br>crown CH <sub>2</sub> twist &<br>rock | <b>1047</b> | 142      | gluc CCH bend,<br>COH bend,<br>gluc & gluc'<br>deform,<br>gluc (CO stretch)                                                                         |             |     |                                                                                               |
| <b>1063</b> | 297 | crown COC asym<br>stretch,<br>gluc C-OH stretch,<br>gluc' COH & CCH<br>bend                                              | <b>1062</b> | 171, 126 | gluc' C-O asym<br>stretch,<br>C-OH stretch,<br>gluc & gluc' COH<br>& CCH bend,<br>crown CH <sub>2</sub> twist                                       |             |     |                                                                                               |

|             |     |                                                                                   |             |     |                                                                                       |             |                                            |                                                                        |             |
|-------------|-----|-----------------------------------------------------------------------------------|-------------|-----|---------------------------------------------------------------------------------------|-------------|--------------------------------------------|------------------------------------------------------------------------|-------------|
| <b>1075</b> | 91  | gluc & gluc' C-OH stretch & bend, gluc & gluc' deform (CC & CO stretch, CCH bend) |             |     | <b>1075</b>                                                                           | 143         | C3-OH stretch, COH & CCH bend, gluc deform |                                                                        |             |
| <b>1090</b> | 134 | C5-C6 & C6-OH stretch, CN stretch, gluc deform, gluc' COH bend                    | <b>1090</b> | 125 | C5'-C6' & C6'-OH stretch, gluc' deform (CCC & CCH bend), gluc' COH bend               | <b>1076</b> | 149                                        | C5-C6 & C6-OH stretch, glucCN stretch, gluc' CC stretch, C2'OH bend,   |             |
| <b>1092</b> | 112 | C5'-C6' & C6'-OH stretch, gluc' deform (CCC & CCH bend), gluc' COH bend           | <b>1095</b> | 160 | C5-C6 & C6-OH stretch, gluc deform (CO stretch), CNH bend, crown CH <sub>2</sub> rock | <b>1083</b> | 123                                        | C2'-OH stretch, COH, OCH & CCH bends, C6H <sub>2</sub> rock            |             |
| <b>1108</b> | 105 | C4'OH bend, C1'C2' stretch, C2OH bend, CN stretch, crown CH <sub>2</sub> rock     | <b>1107</b> | 91  | gluc deform (CO stretch, CCH bend), C6-OH bend, C6H <sub>2</sub> twist, CNH bend      | <b>1110</b> | 131                                        | gluc CC stretch, CNH bend, COH bends, crown CH <sub>2</sub> rock,      |             |
|             |     |                                                                                   | <b>1109</b> | 109 | C2-OH stretch, crown deform, gluc deform                                              | <b>1111</b> | 115                                        | gluc CC & CO asym stretch, CNH bend, COH bends, C6H <sub>2</sub> rock, | <b>1116</b> |
|             |     |                                                                                   | <b>1111</b> | 153 | crown COC asym stretch, crown CH <sub>2</sub> rock and twist, gluc CCH bend           |             |                                            |                                                                        |             |
|             |     |                                                                                   | <b>1143</b> | 259 | gluc'C-O-Cgluc asym stretch, C5'C6' stretch, gluc' deform (COC sciss, CCH bend)       | <b>1139</b> | 157                                        | gluc'C-O-Cgluc asym stretch, gluc' deform, COH & CCH bend              |             |

|             |     |                                                                                                        |             |             |                                                                                |                                                                                  |             |                                                                 |             |
|-------------|-----|--------------------------------------------------------------------------------------------------------|-------------|-------------|--------------------------------------------------------------------------------|----------------------------------------------------------------------------------|-------------|-----------------------------------------------------------------|-------------|
| <b>1163</b> | 99  | CN stretch,<br>crown CH <sub>2</sub> twist &<br>rock,<br>C4'OH bend                                    |             |             |                                                                                | <b>1166</b>                                                                      |             |                                                                 |             |
| <b>1169</b> | 47  | CN stretch, crown<br>CH <sub>2</sub> twist & rock                                                      |             | <b>1174</b> | 97                                                                             | C2OH & C6'OH<br>bend,<br>CCH bend                                                |             |                                                                 |             |
| <b>1192</b> | 113 | C4'OH & C6'OH<br>bend,<br>C6'H <sub>2</sub> twist,<br>CCH bend                                         | <b>1185</b> | 27          | crown CN & CC<br>stretch,<br>crown CH <sub>2</sub> twist                       | <b>1183</b>                                                                      | 101         | C6OH, C6'OH &<br>C4'OH bend,<br>CCH bend                        |             |
| <b>1227</b> | 410 | C2OH bend,<br>CNH bend,<br>crownN-C stretch,<br>crown CH <sub>2</sub> twist,<br>C6H <sub>2</sub> twist | <b>1228</b> | 95          | crown C-NH<br>stretch & bend,<br>crown CH <sub>2</sub> twist,<br>gluc COH bend |                                                                                  |             |                                                                 |             |
|             |     |                                                                                                        |             | <b>1244</b> | 84                                                                             | C2'OH, C3'OH &<br>C4'OH bend,<br>crown CH <sub>2</sub> twist,<br>gluc' CCH bend, | <b>1288</b> |                                                                 |             |
|             |     |                                                                                                        | <b>1310</b> | 67          | CCH & CNH<br>bend, crown CH <sub>2</sub><br>twist                              | <b>1308</b>                                                                      | 54          | COH, CCH &<br>CNH bend,<br>crown CH <sub>2</sub> twist          | <b>1315</b> |
| <b>1378</b> | 97  | C2OH & CC2H<br>bend,<br>crown CH <sub>2</sub> wag,<br>CCH bend,                                        | <b>1372</b> | 79          | C3'OH bend,<br>crown CH <sub>2</sub> wag                                       | <b>1356</b>                                                                      | 87          | C6OH, C2OH<br>bend,<br>CCH bend, crown<br>CH <sub>2</sub> twist | <b>1359</b> |
| <b>1424</b> | 87  | C4'OH & OC4'H<br>bend,<br>gluc CH bend,<br>C6'H <sub>2</sub> sciss                                     | <b>1415</b> | 100         | C6OH, C4'OH &<br>C2'OH bend and<br>corresponding<br>OCH bend                   | <b>1427</b>                                                                      | 153         | C2'OH, C4'OH &<br>C2OH bend,<br>CCH bend                        | <b>1418</b> |
| <b>1434</b> | 88  | C6'OH bend, C6'H <sub>2</sub><br>wag, C2'OH bend,<br>gluc' CH bend                                     |             | <b>1442</b> | 104                                                                            | C2'OH & C2OH<br>bend,<br>C6'H <sub>2</sub> sciss,<br>crown CH <sub>2</sub> sciss | <b>1458</b> |                                                                 |             |

|              |      |                                                                       |              |       |                                                                           |              |      |                                                                           |             |
|--------------|------|-----------------------------------------------------------------------|--------------|-------|---------------------------------------------------------------------------|--------------|------|---------------------------------------------------------------------------|-------------|
| <b>1474</b>  | 86   | crown CH <sub>2</sub> sciss                                           | <b>1467</b>  | 16-23 | crown CH <sub>2</sub> sciss                                               | <b>1460</b>  | 5-89 | crown CH <sub>2</sub> sciss                                               |             |
|              |      |                                                                       | <b>-1495</b> |       |                                                                           | <b>-1481</b> |      |                                                                           |             |
| <b>1485</b>  | 108  | crown CH <sub>2</sub> sciss                                           |              |       |                                                                           |              |      |                                                                           |             |
| <b>1521</b>  | 602  | CNH & NCH bend,<br>CNC asym stretch,<br>crown CH <sub>2</sub> sciss   | <b>1501</b>  | 404   | CNH & NCH<br>bend,<br>CNC asym<br>stretch,<br>crown CH <sub>2</sub> sciss | <b>1484</b>  | 468  | CNH & NCH<br>bend,<br>CNC asym<br>stretch,<br>crown CH <sub>2</sub> sciss |             |
| <b>1525</b>  | 290  | CNH & NCH bend,<br>CNC asym stretch,<br>crown CH <sub>2</sub> sciss   | <b>1547</b>  | 462   | CNH & NCH<br>bend,<br>CNC asym<br>stretch,<br>crown CH bend               | <b>1495</b>  | 423  | CNH & NCH<br>bend,<br>CNC asym<br>stretch,<br>crown CH <sub>2</sub> sciss | <b>1541</b> |
| <b>1710</b>  | 394  | C=O stretch,<br>CNH bend,<br>NCH bend,<br>crown CH <sub>2</sub> sciss | <b>1596</b>  | 440   | C=O stretch,<br>CNH bend,<br>NCH bend,<br>crown CH <sub>2</sub> sciss     | <b>1637</b>  | 472  | C=O stretch,<br>CNH bend,<br>NCH bend,<br>crown CH <sub>2</sub> sciss     | <b>1636</b> |
| <b>1711</b>  | 200  | C=O stretch,<br>CNH bend,<br>NCH bend,<br>crown CH <sub>2</sub> sciss | <b>1651</b>  | 299   | C=O stretch,<br>CNH bend,<br>NCH bend,<br>crown CH <sub>2</sub> sciss     | <b>1641</b>  | 239  | C=O stretch,<br>CNH bend,<br>NCH bend,<br>crown CH <sub>2</sub> sciss     |             |
| <b>2874</b>  | 3-91 | C-H stretch                                                           | <b>2841</b>  | 2-157 | C-H stretch                                                               | <b>2861</b>  | 2-67 | C-H stretch                                                               | <b>2881</b> |
| <b>-3032</b> |      |                                                                       | <b>-3091</b> |       |                                                                           | <b>-3059</b> |      |                                                                           | <b>2920</b> |
|              |      |                                                                       | <b>3250</b>  | 811   | OH stretch                                                                |              |      |                                                                           |             |
|              |      |                                                                       |              |       |                                                                           | <b>3300</b>  | 291  | NH stretch,<br>OH stretch                                                 |             |
|              |      |                                                                       |              |       |                                                                           | <b>3315</b>  | 626  | NH stretch,<br>OH stretch                                                 |             |
| <b>3333</b>  | 338  | OH stretch                                                            | <b>3323</b>  | 635   | OH stretch                                                                |              |      |                                                                           |             |
|              |      |                                                                       | <b>3366</b>  | 135   | NH stretch                                                                | <b>3351</b>  | 602  | OH stretch                                                                |             |
|              |      |                                                                       | <b>3367</b>  | 383   | OH stretch                                                                |              |      |                                                                           |             |



|             |      |                           |             |      |            |             |      |            |             |
|-------------|------|---------------------------|-------------|------|------------|-------------|------|------------|-------------|
| <b>3394</b> | 1227 | OH stretch                | <b>3385</b> | 595  | OH stretch | <b>3395</b> | 63   | OH stretch |             |
| <b>3404</b> | 1094 | OH stretch                | <b>3395</b> | 1221 | OH stretch | <b>3402</b> | 1172 | OH stretch |             |
|             |      |                           | <b>3426</b> | 207  | OH stretch | <b>3408</b> | 442  | OH stretch |             |
| <b>3433</b> | 289  | OH stretch                | <b>3430</b> | 478  | OH stretch |             |      |            | <b>3420</b> |
| <b>3445</b> | 184  | OH stretch                |             |      |            | <b>3445</b> | 18   | NH stretch |             |
| <b>3456</b> | 241  | OH stretch                |             |      |            |             |      |            |             |
| <b>3473</b> | 155  | NH stretch,<br>OH stretch |             |      |            |             |      |            |             |
| <b>3488</b> | 111  | NH stretch,<br>OH stretch |             |      |            | <b>3488</b> | 424  | OH stretch |             |
|             |      |                           | <b>3516</b> | 35   | NH stretch |             |      |            |             |
|             |      |                           | <b>3541</b> | 146  | OH stretch |             |      |            |             |
| <b>3549</b> | 170  | OH stretch                | <b>3543</b> | 346  | OH stretch |             |      |            |             |
| <b>3552</b> | 137  | OH stretch                |             |      |            | <b>3554</b> | 110  | NH stretch |             |
| <b>3558</b> | 472  | OH stretch                | <b>3554</b> | 126  | OH stretch |             |      |            |             |
| <b>3570</b> | 354  | OH stretch                |             |      |            |             |      |            |             |
| <b>3575</b> | 108  | OH stretch                |             |      |            | <b>3590</b> | 168  | OH stretch |             |
|             |      |                           |             |      |            | <b>3617</b> | 124  | OH stretch |             |

---

**Table S2**

Values of changes  $\Delta\delta$  in  $^1\text{H}$  scaled chemical shifts [ppm] computed in vacuo and in water for each specified atom in the aspirin and the host molecule upon formation of complex 1:1 compared to experimental data. The changes are calculated as  $\Delta\delta = \delta_{\text{complex}} - \delta_{\text{substrate}}$ , in the pairs shown in columns. Averaged values are also included. Last column contains our experimental values obtained in D2O.

| Aspirin                                                 | Calc. VACUO |          |          | Calc. WATER |          |          | EXP     |
|---------------------------------------------------------|-------------|----------|----------|-------------|----------|----------|---------|
|                                                         | A'-Asp.     | B'- Asp. | C'- Asp. | A'- Asp.    | B'- Asp. | C'- Asp. |         |
| H-3 <sub>as</sub>                                       | -0.017      | -0.099   | 1.468    | -0.008      | -0.012   | 1.165    | -0.0206 |
| H-4 <sub>as</sub>                                       | -0.037      | -0.055   | 0.916    | -0.081      | -0.053   | 0.445    | -0.0333 |
| H-5 <sub>as</sub>                                       | 0.032       | 1.080    | 0.130    | -0.093      | 0.664    | -0.030   | -0.0206 |
| H-6 <sub>as</sub>                                       | -0.357      | 0.078    | -0.572   | -0.487      | -0.062   | -0.581   | -0.0490 |
| H-9 <sub>as</sub>                                       | 0.300       | 2.177    | 0.262    | 0.230       | 1.474    | -0.050   |         |
| H-9 <sub>as</sub>                                       | 0.569       | 0.278    | 0.393    | 0.198       | 0.046    | -0.218   |         |
| H-9 <sub>as</sub>                                       | -0.336      | -0.589   | -0.755   | -0.150      | -0.429   | -0.621   |         |
| <i>Averaged</i><br>H-9 <sub>as</sub> (CH <sub>3</sub> ) | 0.178       | 0.622    | -0.033   | 0.093       | 0.364    | -0.296   | -0.0107 |
| Host                                                    | A'-A        | B'-B     | C'-C     | A'-A        | B'-B     | C'-C     |         |
| H-1                                                     | 0.097       | 0.590    | 0.434    | 0.003       | 0.664    | 0.469    | -0.0022 |
| H-1                                                     | -0.295      | 0.041    | 0.016    | -0.283      | -0.093   | 0.020    | -0.0022 |
| H-1'                                                    | -0.130      | 0.002    | -0.264   | 0.084       | -0.028   | -0.024   | -0.0031 |
| H-1'                                                    | -0.054      | -1.046   | -0.800   | -0.069      | -0.906   | 0.206    | -0.0031 |
| H-6a                                                    | -0.075      | -0.009   | -0.021   | -0.026      | 0.013    | -0.199   | -0.0020 |
| H-6a                                                    | 0.049       | -0.272   | -0.187   | 0.082       | -0.243   | -0.057   | -0.0020 |
| H-6b                                                    | -0.107      | 0.058    | 0.260    | -0.070      | 0.074    | 0.339    | -0.0020 |
| H-6b                                                    | -0.085      | 0.075    | -0.423   | 0.079       | -0.037   | -0.316   | -0.0020 |
| <i>Averaged</i><br><i>values for host:</i>              |             |          |          |             |          |          |         |
| H-1                                                     | -0.099      | 0.316    | 0.225    | -0.140      | 0.285    | 0.244    | -0.0022 |
| H-1'                                                    | -0.092      | -0.522   | -0.532   | 0.007       | -0.467   | 0.091    | -0.0031 |
| H-6a                                                    | -0.013      | -0.140   | -0.104   | 0.028       | -0.115   | -0.128   | -0.0020 |
| H-6b                                                    | -0.096      | 0.066    | -0.082   | 0.005       | 0.019    | 0.012    | -0.0020 |
